# Supplementary material
Source: PubMed Central journal article supplement (PMC4309692)
Supplement: AEM.03408-14_zam999116007so1.pdf [file AEM.03408-14_zam999116007so1.pdf]

## Supplementary Information

### Genome-Wide Identification of Genes Necessary for Biofilm Formation of Nosocomial Pathogen *Stenotrophomonas maltophilia* Reveals Orphan Response Regulator FsnR is a Critical Modulator

Xiu-Min Kang<sup>1,2§</sup>, Fang-Fang Wang<sup>1§</sup>, Huan Zhang<sup>1,3</sup>, Qi Zhang<sup>2\*</sup>, Wei Qian<sup>1\*</sup>

<sup>1</sup> State Key Laboratory of Plant Genomics, Institute of Microbiology, Chinese Academy of Sciences, Beijing 100101, China. <sup>2</sup> School of Chemical Engineering & Environment, Beijing Institute of Technology, Beijing 100081, China. <sup>3</sup> College of Life Sciences, University of Chinese Academy of Sciences, Beijing 100049, China.

§ These authors contributed equally to this work

\* Corresponding authors. Wei Qian, Tel: +86-10-64806063; Fax: +86-10-64858245; Email: qianw@im.ac.cn. Qi Zhang, Tel: 86-10-68918012; Email: zhangqi@bit.edu.cn

**Keywords:** *Stenotrophomonas maltophilia*, biofilm, transposon mutagenesis, response regulator, flagella assembly

**Table S1.** TAIL-PCR identification of genes associated with biofilm formation of *Stenotrophomonas maltophilia*

| Library ID                | Gene name   | Gene code <sup>1</sup> | Insertion site | Putative function or description       | Relative production of biofilm <sup>2</sup> |
|---------------------------|-------------|------------------------|----------------|----------------------------------------|---------------------------------------------|
| <b>Flagellar and pili</b> |             |                        |                |                                        |                                             |
| SMA21-B18                 | <i>flgE</i> | Smlt2314               | 2356638        | flagellar hook protein FlgE            | 0.09 ± 0.02                                 |
| SMA24-K12                 | <i>flgE</i> | Smlt2314               | 2357167        | flagellar hook protein FlgE            | 0.06 ± 0.02                                 |
| SMA23-F7                  | <i>flgK</i> | Smlt2308               | 2351423        | flagellar hook-associated protein FlgK | 0.20 ± 0.02                                 |
| SMA22-P5                  | <i>flgK</i> | Smlt2308               | 2350254        | flagellar hook-associated protein FlgK | 0.24 ± 0.02                                 |
| SMA7-D19                  | <i>flgG</i> | Smlt2312               | 2355626        | flagellar basal body rod protein FlgG  | 0.16 ± 0.02                                 |
| SMA3-A22                  | <i>flgH</i> | Smlt2311               | 2354349        | flagellar basal body L-ring protein    | 0.29 ± 0.02                                 |
| SMA12-E14                 | <i>flhF</i> | Smlt2272               | 2314389        | flagellar biosynthesis regulator FlhF  | 0.10 ± 0.02                                 |
| SMA33-M8                  | <i>flgI</i> | Smlt2310               | 2354014        | flagellar basal body P-ring protein    | 0.09 ± 0.02                                 |
| SMA36-A20                 | <i>flhA</i> | Smlt2273               | 2315325        | flagellar biosynthesis protein FlhA    | 0.04 ± 0.02                                 |
| SMA24-L1                  | <i>fliI</i> | Smlt2286               | 2329126        | flagellum-specific ATP synthase        | 0.04 ± 0.02                                 |
| SMA5-N23                  | <i>fliI</i> | Smlt2286               | 2329375        | flagellum-specific ATP synthase        | 0.15 ± 0.02                                 |
| SMA1-O11                  | <i>fliN</i> | Smlt2281               | 2325341        | flagellar motor switch protein         | 0.02 ± 0.02                                 |
| SMA7-L17                  | <i>fliN</i> | Smlt2281               | 2325099        | flagellar motor switch protein         | 0.04 ± 0.02                                 |
| SMA5-B13                  | <i>fliD</i> | Smlt2303               | 2344144        | flagellar hook-associated protein 2    | 0.29 ± 0.02                                 |
| SMA8-H1                   | <i>fliD</i> | Smlt2303               | 2343369        | flagellar hook-associated protein 2    | 0.22 ± 0.02                                 |
| SMA20-O1                  | <i>fliD</i> | Smlt2303               | 2343922        | flagellar hook-associated protein 2    | 0.11 ± 0.02                                 |
| SMA29-J9                  | <i>fliO</i> | Smlt2280               | 2324844        | flagellar protein FliO                 | 0.03 ± 0.02                                 |
| SMA27-G19                 | <i>fliF</i> | Smlt2289               | 2332513        | flagellar MS-ring protein              | 0.48 ± 0.02                                 |
| SMA22-G16                 | <i>fliF</i> | Smlt2289               | 2332351        | flagellar MS-ring protein              | 0.13 ± 0.02                                 |
| SMA33-D16                 | <i>fliM</i> | Smlt2282               | 2325508        | flagellar motor switch protein FliM    | 0.08 ± 0.02                                 |
| SMA29-N19                 | <i>fliK</i> | Smlt2284               | 2327270        | flagellar hook-length control protein  | 0.06 ± 0.02                                 |
| SMA37-A8                  |             | Smlt0709               | 739626         | fimbria adhesin protein                | 0.06 ± 0.02                                 |

|                                                                |             |          |         |                                                         |             |
|----------------------------------------------------------------|-------------|----------|---------|---------------------------------------------------------|-------------|
| SMA10-I4                                                       |             | Smlt0707 | 736153  | pili chaperone protein                                  | 0.00 ± 0.02 |
| SMA26-D10                                                      |             | Smlt0707 | 736381  | pili chaperone protein                                  | 0.05 ± 0.02 |
| SMA21-J12                                                      |             | Smlt0707 | 735772  | pili chaperone protein                                  | 0.03 ± 0.02 |
| SMA1-D14                                                       | <i>fimV</i> | Smlt3426 | 3467204 | fimV protein                                            | 0.40 ± 0.02 |
| <b>Polysaccharide biosynthesis and carbohydrate metabolism</b> |             |          |         |                                                         |             |
| SMA11-N24                                                      | <i>xanA</i> | Smlt0653 | 670657  | phosphohexosemutase                                     | 0.00 ± 0.02 |
| SMA24-K24 <sup>3</sup>                                         |             | Smlt3804 | 3885560 | glyceraldehyde 3-phosphate dehydrogenase                | 1.19 ± 0.02 |
| SMA6-A2                                                        |             | Smlt4259 | 4372983 | uracil-DNA glycosylase                                  | 1.21 ± 0.02 |
| SMA26-B22                                                      |             | Smlt0490 | 500892  | pyruvate dehydrogenase subunit E1                       | 2.08 ± 0.02 |
| <b>Purine biosynthesis</b>                                     |             |          |         |                                                         |             |
| SMA34-L13                                                      | <i>purE</i> | Smlt1613 | 1676463 | phosphoribosylaminoimidazole carboxylase                | 0.47 ± 0.02 |
| SMA2-D12                                                       | <i>purK</i> | Smlt1614 | 1677627 | phosphoribosylaminoimidazole carboxylase ATPase subunit | 0.40 ± 0.02 |
| SMA5-E20                                                       | <i>purK</i> | Smlt1614 | 1677333 | phosphoribosylaminoimidazole carboxylase ATPase subunit | 0.56 ± 0.02 |
| SMA28-I22                                                      | <i>purD</i> | Smlt4254 | 4369733 | phosphoribosylamine--glycine ligase                     | 0.41 ± 0.02 |
| SMA28-E14                                                      | <i>purC</i> | Smlt4318 | 4434102 | phosphoribosylaminoimidazolesuccinocarboxamide synthase | 0.52 ± 0.02 |
| SMA25-F12                                                      | <i>purC</i> | Smlt4318 | 4434385 | phosphoribosylaminoimidazolesuccinocarboxamide synthase | 0.52 ± 0.02 |
| SMA34-D21                                                      | <i>purL</i> | Smlt0684 | 708539  | phosphoribosylformylglycinamide synthase                | 0.28 ± 0.02 |
| SMA14-N11                                                      | <i>guaA</i> | Smlt2072 | 2098217 | GMP synthase                                            | 0.01 ± 0.02 |
| <b>Transportation</b>                                          |             |          |         |                                                         |             |
| SMA21-I12                                                      | <i>mrkC</i> | Smlt0708 | 738300  | outer membrane usher protein mrkc precursor             | 0.06 ± 0.02 |
| SMA25-J1                                                       | <i>mrkC</i> | Smlt0708 | 738264  | outer membrane usher protein mrkc precursor             | 0.05 ± 0.02 |
| SMA1-M13                                                       | <i>mrkC</i> | Smlt0708 | 737324  | outer membrane usher protein mrkc precursor             | 0.03 ± 0.02 |
| SMA23-L17                                                      | <i>mrkC</i> | Smlt0708 | 739000  | outer membrane usher protein mrkc precursor             | 0.04 ± 0.02 |
| SMA2-C16                                                       | <i>mrkC</i> | Smlt0708 | 737190  | outer membrane usher protein mrkc precursor             | 0.13 ± 0.02 |
| SMA20-H21                                                      |             | Smlt4552 | 4672328 | glutathione-regulated cation-efflux system              | 0.06 ± 0.02 |
| SMA26-E2                                                       |             | Smlt0845 | 887435  | transmembrane transport protein                         | 0.12 ± 0.02 |
| <b>Gene regulation</b>                                         |             |          |         |                                                         |             |
| SMA4-B6                                                        |             | Smlt2299 | 2340975 | response regulator protein LuxR family                  | 0.03 ± 0.02 |

|                                       |             |                   |               |                                           |                    |
|---------------------------------------|-------------|-------------------|---------------|-------------------------------------------|--------------------|
| SMA7-F19                              |             | Smlt2297          | 2340048       | RNA polymerase sigma-54 factor (sigma-N)  | 0.03 ± 0.02        |
| SMA31-L10                             | <i>fliA</i> | Smlt2270          | 2311509       | RNA polymerase sigma factor for flagellar | 0.04 ± 0.02        |
| SMA32-N20                             | <i>ravS</i> | Smlt2324          | 2366132       | PAS domain sensor histidine kinase        | 0.16 ± 0.02        |
| SMA27-H15                             | <i>glnL</i> | Smlt0158          | 172801        | nitrogen regulation protein NR(II)        | 0.55 ± 0.02        |
| <b>Peptide and lipid biosynthesis</b> |             |                   |               |                                           |                    |
| SMA26-C23                             |             | Smlt0208          | 222379        | peptide synthase                          | 0.35 ± 0.02        |
| SMA11-F15                             |             | Smlt0208          | 222773        | peptide synthase                          | 0.39 ± 0.02        |
| SMA26-F10                             |             | Smlt0208          | 223044        | peptide synthase                          | 0.56 ± 0.02        |
| SMA23-C6                              |             | Smlt0208          | 222148        | peptide synthase                          | 0.56 ± 0.02        |
| SMA15-G14                             |             | Smlt0208          | 221659        | peptide synthase                          | 0.56 ± 0.02        |
| SMA27-O8                              |             | Smlt0208          | 222499        | peptide synthase                          | 0.51 ± 0.02        |
| SMA18-J16                             |             | Smlt0418          | 427771        | aminopeptidase                            | 0.16 ± 0.02        |
| <b>SMA30-B20</b>                      |             | <b>Smlt0625</b>   | <b>641485</b> | <b>lipase</b>                             | <b>1.32 ± 0.02</b> |
| <b>Oxidoreduction</b>                 |             |                   |               |                                           |                    |
| SMA25-G12                             |             | Smlt0209          | 223554        | NAD(P)H dehydrogenase                     | 0.40 ± 0.02        |
| SMA36-C6                              |             | Smlt0209          | 223158        | NAD(P)H dehydrogenase                     | 0.38 ± 0.02        |
| SMA20-E12                             |             | Smlt0209          | 223345        | NAD(P)H dehydrogenase                     | 0.59 ± 0.02        |
| SMA3-K17                              | <i>pntB</i> | Smlt0857          | 897800        | NAD(P) transhydrogenase subunit beta PntB | 0.32 ± 0.02        |
| SMA14-L15                             |             | Smlt3167          | 3208008       | NAD-dependent glutamate dehydrogenase     | 0.51 ± 0.02        |
| <b>Function unknown</b>               |             |                   |               |                                           |                    |
| SMA30-E7                              |             | Smlt0276          | 293008        | hypothetical protein                      | 0.27 ± 0.02        |
| SMA31-C20                             |             | Smlt3195          | 3236474       | hypothetical protein                      | 0.44 ± 0.02        |
| <b>SMA28-M23</b>                      |             | <b>Smlt0416</b>   | <b>393052</b> | <b>hypothetical protein</b>               | <b>1.44 ± 0.02</b> |
| SMA34-E19                             |             | Smlt0639          | 656017        | hypothetical protein                      | 0.10 ± 0.02        |
| <b>Transposable elements</b>          |             |                   |               |                                           |                    |
| SMA14-I22                             |             | Smlt0518          | 526451        | transposase                               | 0.47 ± 0.02        |
| <b>Intergenic region</b>              |             |                   |               |                                           |                    |
| SMA10-P7                              |             | Smlt0704-Smlt0706 |               | Intergenic region                         | 0.12 ± 0.02        |

|                                                 |                                           |                   |                    |
|-------------------------------------------------|-------------------------------------------|-------------------|--------------------|
| SMA13-I9                                        | Smlt0417-Smlt0418                         | Intergenic region | 0.50 ± 0.02        |
| SMA35-A20                                       | Smlt0722-Smlt0723                         | Intergenic region | 0.42 ± 0.02        |
| SMA37-D2                                        | Smlt4645-Smlt4647                         | Intergenic region | 0.06 ± 0.02        |
| <b>Undefined (inserted in multi-copy locus)</b> |                                           |                   |                    |
| SMA31-H5                                        | 416255、421919、<br>4792803、4787139         | ND                | 0.10 ± 0.02        |
| <b>SMA21-O22</b>                                | <b>416470、422134、<br/>4786924、4792588</b> | <b>ND</b>         | <b>1.70 ± 0.02</b> |

1. Gene code and names are according to the genomic annotation of *S. maltophilia* K279a
2. Relative production of biofilm of mutants are compared to that of the wild-type (set as unit). Standard deviations are shown (n = 3)
3. Mutants in red highlighted that mutation of these genes caused increase in biofilm formation.

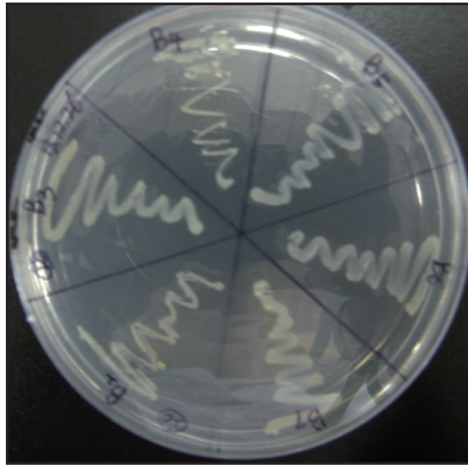

**FIG S1.** Stability of the EZ::TN transposon inserted mutants. Six transformants from the mutant library were randomly selected. The bacterial progenies were grown in NYG agar without any antibiotics for 20 rounds of subcultures under 28°C. After subculture, bacterial strains were inoculated onto a NYG agar containing kanamycin (50 µg/ml) and cultured for 48 hours under 28°C.

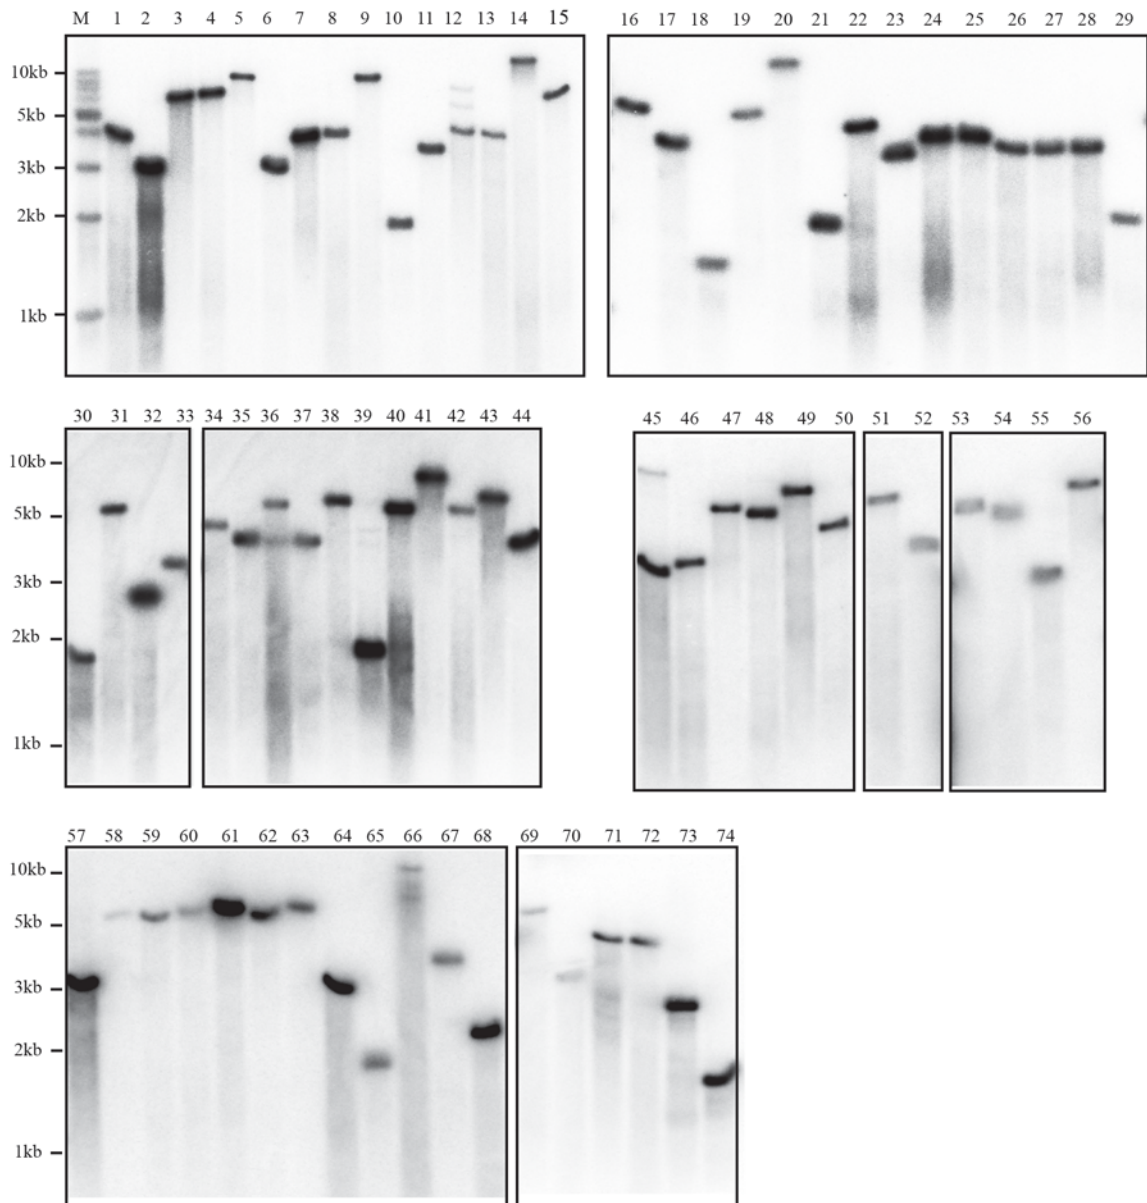

**FIG. S2.** Determination of insertional copy numbers of identified mutants. Transposon insertion numbers were analyzed by Southern blotting. Total DNA of the bacterial strains were digested by *Sma*I and separated in 1% agarose gel. A PCR product of EZ::TN transposon was labeled by [ $\alpha$ - $^{32}$ P]-dCTP and used as DNA probe in hybridization. M: 1 kb DNA ladder. The numbers of lanes are according to the codes of mutant library and Table S1, as follows:

1: SMA11-F15, 2: SMA7-F19, 3: SMA5-N23, 4: SMA33-M8, 5: SMA31-L10, 6: SMA4-B6  
7: SMA15-G14, 8: SMA20-E12, 9: SMA12-E14, 10: SMA3-A22, 11: SMA23-C6, 12: SMA8-H1  
13: SMA20-O1, 14: SMA28-I22, 15: SMA24-L1, 16: SMA33-D16, 17: SMA25-G12, 18: SMA34-D21  
19: SMA24-K12, 20: SMA31-H5, 21: SMA28-E14, 22: SMA5-B13, 23: SMA23-L17, 24: SMA27-O8  
25: SMA26-F10, 26: SMA1-M13, 27: SMA25-J1, 28: SMA21-I12, 29: SMA27-H15, 30: SMA25-F12  
31: SMA5-E20, 32: SMA10-P7, 33: SMA35-A20, 34: SMA21-B18, 35: SMA26-D10, 36: SMA18-J16  
37: SMA21-J12, 38: SMA3-K17, 39: SMA13-I9, 40: SMA14-I22, 41: SMA1-D14, 42: SMA37-A8  
43: SMA34-E19, 44: SMA36-C6, 45: SMA2-C16, 46: SMA26-C23, 47: SMA32-N20, 48: SMA29-N19  
49: SMA36-A20, 50: SMA29-J9, 51: SMA27-G19, 52: SMA10-I4, 53: SMA34-L13, 54: SMA22-G16  
55: SMA7-D19, 56: SMA14-L15, 57: SMA14-N11, 58: SMA37-D2, 59: SMA7-L17, 60: SMA23-F7  
61: SMA22-P5, 62: SMA2-D12, 63: SMA1-O11, 64: SMA11-N24, 65: SMA31-C20, 66: SMA 26-E2  
67: SMA30-E7, 68: SMA20-H21, 69: SMA30-B20, 70: SMA26-B22, 71: SMA6-A2, 72: SMA28-M23  
73: SMA21-O22, 74: SMA24-K24
